# Supplementary material for: Long Non-Coding RNA MIR31HG Promotes the Transforming Growth Factor β-Induced Epithelial-Mesenchymal Transition in Pancreatic Ductal Adenocarcinoma Cells
Source: MDPI journal article supplement (doi:10.3390/ijms23126559), 2022-06-12
Supplement: s1 [file s1]

## **Supplementary Information**

### **Long Non-Coding RNA *MIR31HG* Promotes the Transforming Growth Factor $\beta$ -Induced Epithelial-Mesenchymal Transition in Pancreatic Ductal Adenocarcinoma Cells**

**Ching-Chung Ko<sup>1,2,3</sup>, Yao-Yu Hsieh<sup>4,5</sup> and Pei-Ming Yang<sup>6,7,8,9,10,\*</sup>**

<sup>1</sup> Department of Medical Imaging, Chi Mei Medical Center, Tainan 71004, Taiwan; kocc0729@gmail.com

<sup>2</sup> Department of Health and Nutrition, Chia Nan University of Pharmacy and Science, Tainan 71710, Taiwan

<sup>3</sup> Institute of Biomedical Sciences, National Sun Yat-Sen University, Kaohsiung 80424, Taiwan

<sup>4</sup> Division of Hematology and Oncology, Taipei Medical University Shuang Ho Hospital, New Taipei City 23561, Taiwan; alecto39@gmail.com

<sup>5</sup> Division of Hematology and Oncology, Department of Internal Medicine, School of Medicine, College of Medicine, Taipei Medical University, Taipei 11031, Taiwan

<sup>6</sup> Graduate Institute of Cancer Biology and Drug Discovery, College of Medical Science and Technology, Taipei Medical University, Taipei 11031, Taiwan; yangpm@tmu.edu.tw

<sup>7</sup> PhD Program for Cancer Molecular Biology and Drug Discovery, College of Medical Science and Technology, Taipei Medical University and Academia Sinica, Taipei 11031, Taiwan

<sup>8</sup> TMU Research Center of Cancer Translational Medicine, Taipei 11031, Taiwan

<sup>9</sup> Cancer Center, Wan Fang Hospital, Taipei Medical University, Taipei 11696, Taiwan

<sup>10</sup> Taipei Medical University (TMU) and Affiliated Hospitals Pancreatic Cancer Groups, Taipei Cancer Center, Taipei Medical University, Taipei 11031, Taiwan

\* Correspondence: yangpm@tmu.edu.tw; Tel.: +886-2-2697-2035 (ext.143)

**Supplementary Information** includes:

Figure S1: The uncropped images of the Western blots.

# Full unedited blot for Figure 3C

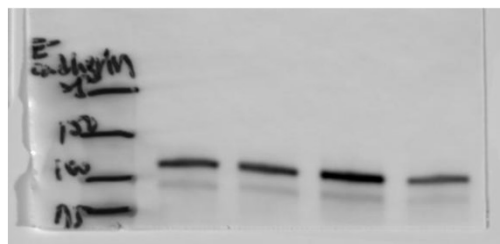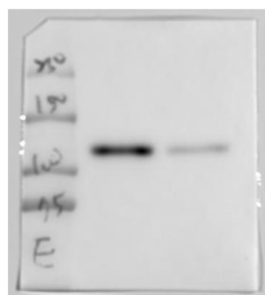

E-cadherin (CDH1)

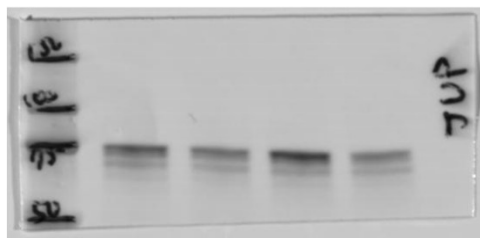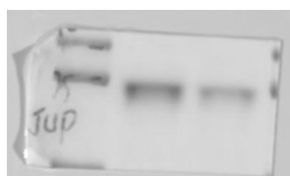

Plakoglobin (JUP)

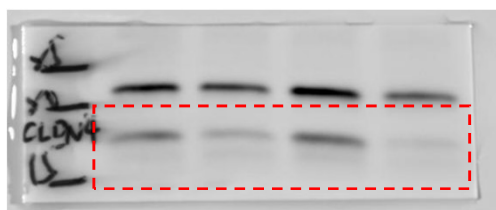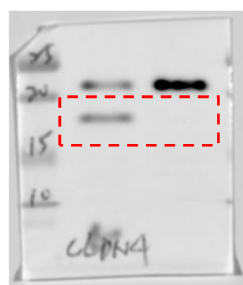

Claudin 4 (CLDN4)

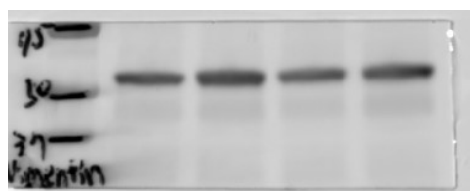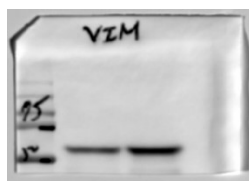

Vimentin (VIM)

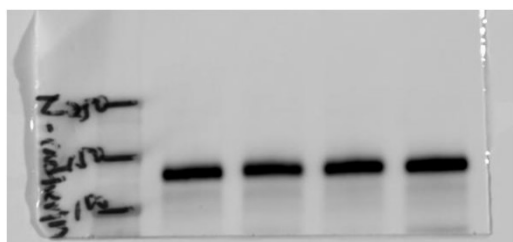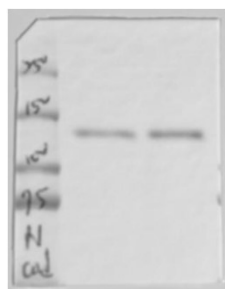

N-cadherin (CDH2)

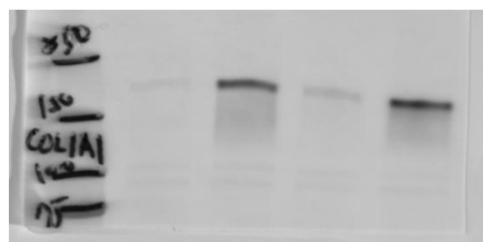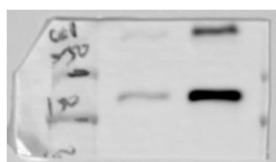

Collagen 1A1 (COL1A1)

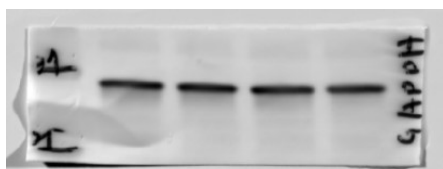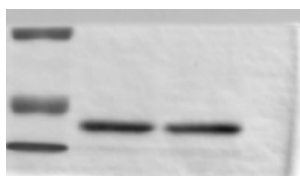

GAPDH

## Full unedited blot for Figure 4C

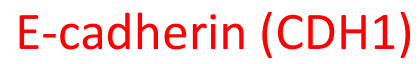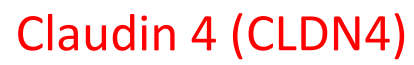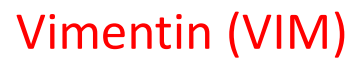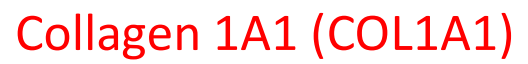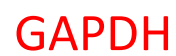

## Full unedited blot for Figure 4F

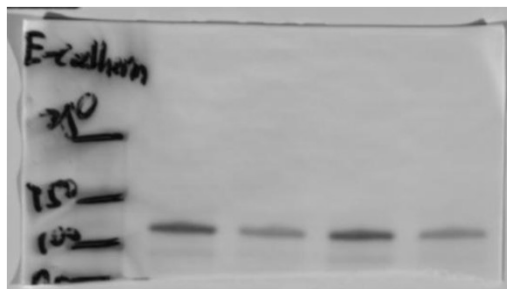

E-cadherin (CDH1)

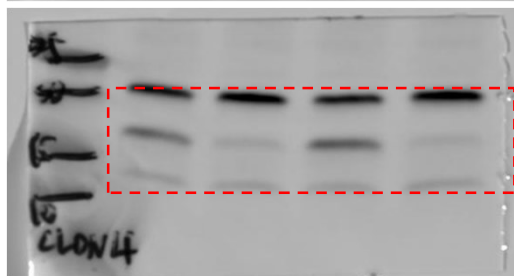

Claudin 4 (CLDN4)

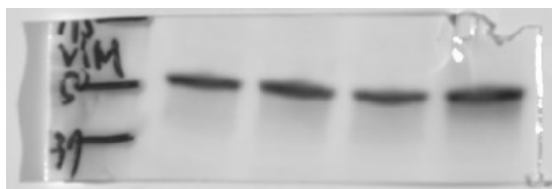

Vimentin (VIM)

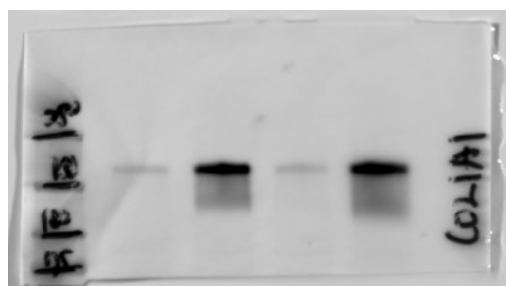

Collagen 1A1 (COL1A1)

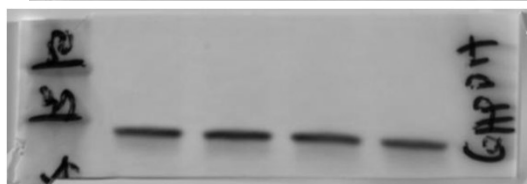

GAPDH
